# Supplementary material for: Genome enrichment of rare and unknown species from complicated microbiomes by nanopore selective sequencing
Source: PubMed Central journal article supplement — Genome Res. 2023 Apr;33(4):612–21. doi: 10.1101/gr.277266.122 (PMC10234302; doi:10.1101/gr.277266.122), 2023-04
Supplement: supp_gr.277266.122_Supplemental__Material.pdf [file supp_gr.277266.122_Supplemental__Material.pdf]

# Supplemental information for

*Genome enrichment of rare and unknown species from complicated  
microbiome by nanopore selective sequencing*

Yuhong Sun <sup>a,#</sup>, Zhanwen Cheng <sup>a,#</sup>, Xiang Li <sup>a,b,c</sup>, Qing Yang <sup>a</sup>,  
Bixi Zhao <sup>a</sup>, Ziqi Wu <sup>a</sup>, Yu Xia <sup>a, b, c \*</sup>

<sup>a</sup> School of Environmental Science and Engineering, College of Engineering,  
Southern University of Science and Technology, Shenzhen 518055, China

<sup>b</sup> State Environmental Protection Key Laboratory of Integrated Surface Water-  
Groundwater Pollution Control, School of Environmental Science and Engineering,  
Southern University of Science and Technology, Shenzhen 518055, China

<sup>c</sup> Guangdong Provincial Key Laboratory of Soil and Groundwater Pollution Control,  
School of Environmental Science and Engineering, Southern University of Science  
and Technology, Shenzhen, 518055, China

# These authors contributed equally to this work

\*Corresponding author:

Yu Xia

Address: School of Environmental Science and Engineering, College of Engineering,  
Southern University of Science and Technology, Shenzhen 518055, China

E-mail: [xiay@sustech.edu.cn](mailto:xiay@sustech.edu.cn)

## Supplemental Items:

### ● Supplemental Text:

Detailed information on community analysis of the thermophilic anaerobic digester (TAD) community, calculation of the abundance of MAGs, and metabolic capacities of *Verstraetearchaeota* and *Bathyarchaeota* phylum in the TAD community.

**Supplemental\_Text\_S1.** 16S rRNA gene amplicon and community analysis of TAD community.

**Supplemental\_Text\_S2.** Calculation of the abundance and assessment of the quality of MAG

**Supplemental\_Text\_S3.** Versatile metabolic capacities of *Verstraetearchaeota* and *Bathyarchaeota* phylum in TAD community.

**Supplemental\_Text\_S4.** Integration tests for the code.

### ● Supplemental Figures:

**Supplemental\_Fig\_S1.** Selective sequencing report of mock community.

**Supplemental\_Fig\_S2.** Bar plot of reads number of the seven microbial species.

**Supplemental\_Fig\_S3.** community structure of the thermophilic anaerobic digester (TAD) community.

**Supplemental\_Fig\_S4.** Rarefaction analysis of nanopore sequencing data.

**Supplemental\_Fig\_S5.** Selective sequencing report of TAD community.

**Supplemental\_Fig\_S6.** Read-length histograms in the TAD community.

**Supplemental\_Fig\_S7.** The number of sequencing channels over the course of the sequencing run in the TAD community.

**Supplemental\_Fig\_S8.** The quality and quantity of bins obtained for contigs of different lengths.

**Supplemental\_Fig\_S9.** Venn diagram of the number of >1Mbp contigs assembled from canu, unicycler, and metaflye, respectively.

**Supplemental\_Fig\_S10.** A phylogenetic tree was constructed from 57 HQ genomes derived from the TAD community and reference genomes.

**Supplemental\_Fig\_S11.** Taxa detected by normal sequencing and the total reads.

**Supplemental\_Fig\_S12.** Correlation between the number of genes of each genome and the Archaeal: Bacterial gene ratio.

**Supplemental\_Fig\_S13.** Genomes comparison of MAG56, MAG57, and reference MAGs.

**Supplemental\_Fig\_S14.** Report of human gut microbial community sequenced with metaRU pore.

**Supplemental\_Fig\_S15.** Correlation between the ejection rate and the time of normal sequencing of human gut microbiota.

**Supplemental\_Fig\_S16.** 3D density plots of t-SNE downscaling results of human gut microbiota.

**Supplemental\_Fig\_S17.** Phylogenetic tree of HQ-MAGs assembled from normal sequencing and metaRUopore data

**Supplemental\_Fig\_S18.** Human read retention ratio after selective nanopore sequencing.

## ● **Supplemental Tables:**

**Supplemental\_Table\_S1.xlsx** Information on the reference genome of the mock community

**Supplemental\_Table\_S2.xlsx** Integrated test of metaRUopore using nanopore reads.

**Supplemental\_Table\_S3.xlsx** Flow cells' yield

**Supplemental\_Table\_S4.xlsx** Basic statistics on the contigs assembled by Canu, metaFlye, and Unicycler

**Supplemental\_Table\_S5.xlsx** Information on the 57 HQ MAGs recovered from TAD community

**Supplemental\_Table\_S6.xlsx** Abundance of the 41 HQ MAGs retrieved by metaRUopore

**Supplemental\_Table\_S7.xlsx** Information of the global genomes collection of the anaerobic reactor (AD) microbiome

**Supplemental\_Table\_S8.xlsx** Information of the genomes to build the gene flow figure of Bathyarchaeota

**Supplemental\_Table\_S9.xlsx** Previous reports about nanopore sequencing yield

## 1 **Supplemental results**

### 2 **Supplemental\_Text\_S1:**

#### 3 **16S rRNA gene amplicon and community analysis of TAD community**

4 Primers 515F (5'-GTGCCAGCMGCCGCGGTAA-3') and 907R (5'-  
5 GGACTACNNGGGTTATCTAAT-3') were used to amplify the V4-V5 region of the 16S  
6 rRNA gene. The amplicon product was purified and then subject to shotgun library  
7 construction and Illumina high-throughput sequencing on the MiSeq at Novogene Co.,  
8 Ltd. (Beijing, China) with PE250 strategy. Fastp (Chen et al., 2018) is used to perform  
9 quality control of the raw reads obtained from Illumina sequencing. Post-QC reads of  
10 16S rRNA gene amplification were imported into the QIIME 1 (Caporaso et al., 2010)  
11 (Quantitative Insights in Microbiology) pipeline to merge pair-end sequences, extract  
12 barcodes, split samples, and remove amplification primers. USEARCHV11 was used  
13 to obtain OTUs with 97% similarity, then taxonomic assignments were achieved from  
14 the Greengenes database (McDonald et al., 2012) with rdp classifier.

### 15 **Supplemental\_Text\_S2:**

#### 16 **Calculation of the abundance and coverage**

17 For the TAD community, abundance was calculated from both selective sequencing  
18 data and normal sequencing data, by mapping these data to the MAGs using minimap2  
19 (Li 2018) (version 2.17) separately using the following flags -ax map-ont -t 40. We used  
20 samtools (Li et al. 2009) (version 1.11) to extract SAM file that matched each MAG  
21 individually. The abundance of each MAG is calculated by dividing the number of  
22 bases in all reads in this SAM file by the total number of bases selectively sequencing

23 or normally sequencing, then normalizing by the size of the MAGs. Analogously, sorted  
24 BAM files were used in the calculation of the coverage of the MAGs. For the mock  
25 community, coverage was calculated by mapping the sequencing reads to the  
26 reference genomes and using the lengths of the reference genomes for normalization  
27 using the same method as above. The information on the reference genome is shown  
28 in Supplemental\_Table\_S1. Reference genomes of the seven bacterial strains were  
29 obtained by *de novo* assembly of individual nanopore sequencing of these strains  
30 using Unicycler. The reference genome sequence of the archaeal strain was  
31 downloaded from NCBI (NZ\_CP039139.1).

### 32 **Supplemental\_Text\_S3:**

#### 33 **Versatile metabolic capacities of Verstraetearchaeota and Bathyarchaeota** 34 **phylum in TAD community.**

35 A complete genome of *Methanosauratus petracarbonis* affiliated with archaeal phylum  
36 *Verstraetearchaeota* was recovered as MAG57. The genome size of MAG57 is 1.5M  
37 and the GC content is 0.54. The abundance of *Methanosauratus petracarbonis* in TAD  
38 community was 0.075 %, which got doubled through selective sequencing, enabling  
39 successful retrieval of its entire genome.

40 MAG57 contains key genes for methane production (*mcrABG* and ancillary genes  
41 *mcrCD*) (Ermler et al. 1997) as well as genes for methylamine utilization (*mtaA*, *mtbA*,  
42 *mtmBC*, *mtbBC*, *mttC*, *mtrH*). The reduction of heterodisulfide (CoM-SS-CoB) to  
43 ferredoxin could be accomplished by the coupling of exergonic H<sub>2</sub>-dependent  
44 heterodisulfide reductase (*hdrB*) and F<sub>420</sub>-non-reducing hydrogenase (*mvhB*).

45 Meanwhile, the cytosolic complex of F420H<sub>2</sub> dehydrogenases (*fpo*) consisted of  
46 consecutively located *fpoM*, *fpoL*, *fpoN*, *fpoK*, *fpoI*, *fpoH* and *fpoD*, can reoxidize the  
47 reduced ferredoxin while pumping protons across the cytoplasmic membrane to  
48 produce a proton gradient that drives the ATP synthesis via an archaeal-type ATP  
49 synthase. Additionally, *HdrD*, which is present in three copies in MAG57 and other  
50 *Verstraetearchaeota* genomes, may directly interact with the *fpo* complex and act as  
51 an energy-converting ferredoxin: heterodisulfide oxido-reductase. Furthermore, genes  
52 for hydrogenotrophic and acetoclastic methanogenesis pathways were absent in  
53 MAG57, a nearly complete genome of *Methanosauratus petracarbonis* species,  
54 consolidating the species' obligate H<sub>2</sub>-dependent methylotrophic methanogenesis  
55 capability (Vanwonterghem et al. 2016; Evans et al. 2019). Notably, while unusual for  
56 microorganisms involved in methane metabolism, the exit of adenosine diphosphate  
57 (ADP)-forming acetate synthetase (*Acd*) in MAG57 demonstrates that it can convert  
58 Acetyl-CoA to acetate, allowing for energy production via substrate-level  
59 phosphorylation (Vanwonterghem et al. 2016). Collectively, the coupling of obligate  
60 H<sub>2</sub>-dependent methylotrophic methanogenesis and acetate-producing fermentative  
61 pathway of *Methanosauratus petracarbonis*'s genomic repertoire found in MAG57,  
62 reveals a unique ecological niche for carbon turnover and energy conservation in  
63 digestive systems rich of reduced methylated carbon compounds.

64 In this work, metaRU<sub>pore</sub> has boosted the abundance of *Bathyarchaeota* in TAD  
65 community, facilitating its genome recovery as MAG56. MAG56 appeared to be  
66 capable of utilizing sugars as a carbon source and generating acetyl-CoA via the

67 Embden–Meyerhof–Parnas (EMP) pathway (a nearly complete operon of *pfk*, *tpi*, *gap*,  
68 *pgk*, *apg*, *eno*, *ppc*) and pyruvate-ferredoxin oxidoreductase (*por*). ADP-forming acetyl-  
69 CoA synthase (*acd*) could then produce ATP and acetate, and this fermentative  
70 lifestyle was predicted to be the metabolic mode of several *mcr*-devoid *Bathyarchaeota*  
71 genomes (Evans et al. 2019; Lazar et al. 2016). Besides that, MAG56 possessed key  
72 genes for the autotrophic reductive acetyl-CoA (Wood–Ljungdahl, WL) pathway (*fwd*,  
73 *ftt*, *mch*, *cdh*), implying its ability to utilize tetrahydromethanopterin (H4MPT) as the  
74 C1-carrier for autotrophic carbon fixation, which is an energy-generating process  
75 prevalent in archaea (Feng et al. 2019). Additionally, the critical genes for lipid and  
76 benzoate degradation (*lcfB* and *acyP*) found in the MAG56 genome demonstrated its  
77 capacity to exploit lipid and benzoate as a source of carbon and energy. These core  
78 metabolic potentials of MAG56 are consistent with previous studies, consolidating  
79 *Bathyarchaeota*'s organoautotrophic life strategy capable of utilizing a diverse array of  
80 carbon sources (Yu et al. 2018; Feng et al. 2019).

#### 81 **Supplemental\_Text\_S4:**

#### 82 **Integration tests for code of metaRU pore.**

83 We have conducted the integration test on metaRU pore workflow using nanopore  
84 reads generated in the first one-hour normal sequencing of six different sample types  
85 including the TAD and human gut sample used for this study and permafrost top soil  
86 sample, a receiving water sample receiving effluent of a domestic wastewater  
87 treatment plant and activated sludge sample of another domestic wastewater  
88 treatment plant as well as an influent sample of a hospital sewage treatment plant from

89 our previous published studies (Wu et al., 2022). The script has been tested using 10  
90 threads on a local workstation (CPU: Xeon(R) 5220R 2.20 GHz × 24 cores with DDR4  
91 64 Gb × 16 Memory). The results show that for all the samples tested, metaRU pore  
92 could finish the analysis within 5 minutes, which will allow for a quick start of the  
93 subsequent RU run with the determined reference and target dataset. Relative results  
94 are shown in Supplemental\_Table\_S1.

95

96 **Reference:**

- 97 Caporaso J G, Kuczynski J, Stombaugh J, Bittinger K, Bushman F D, Costello E K, Fierer N, Pena  
98 A G, Goodrich J K, Gordon J I, et al. QIIME allows analysis of high-throughput community sequencing  
99 data. *Nat. Methods* **2010**: 7 (5), 335-336.
- 100 Chen S F, Zhou Y Q, Chen Y R, Gu J. Fastp: an ultra-fast all-in-one FASTQ preprocessor.  
101 *Bioinformatics* **2018**: 34 (17), 884-890.
- 102 Ermler U, Grabarse W, Shima S, Goubeaud M, Thauer R K. 1997. Crystal Structure of Methyl –  
103 Coenzyme M Reductase : The Key Enzyme of Biological Methane Formation. *Science* **278**: 1457-1462.
- 104 Evans P N, Boyd J A, Leu A O, Woodcroft B J, Parks D H, Hugenholtz P, Tyson G W. 2019. An  
105 evolving view of methane metabolism in the Archaea. *Nat Rev Microbiol* **17**: 219–232
- 106 Feng X, Wang Y, Zubin R, Wang F. 2019. Core Metabolic Features and Hot Origin of  
107 Bathyarchaeota. *Engineering* **5**: 498–504.
- 108 Lazar C S, Baker B J, Seitz K, Hyde A S, Dick G J, Hinrichs K U, Teske A P. 2016. Genomic  
109 evidence for distinct carbon substrate preferences and ecological niches of Bathyarchaeota in estuarine  
110 sediments. *Environ Microbiol* **18**: 1200–1211.



111 McDonald D, Price M N, Goodrich J, Nawrocki E P, DeSantis T Z, Probst A, Andersen G L, Knight  
112 R, Hugenholtz P. An improved Greengenes taxonomy with explicit ranks for ecological and evolutionary  
113 analyses of bacteria and archaea. *ISME J* **2012**: 6 (3), 610-618.

114 Vanwonterghem I, Evans P N, Parks D H, Jensen P D, Woodcroft B J, Hugenholtz P, Tyson G W.  
115 2016. Methylophilic methanogenesis discovered in the archaeal phylum Verstraetearchaeota. *Nat*  
116 *Microbiol* **1**: 1–9.

117 Yu T, Wu W, Liang W, Alexander M, Hinrichs K. 2018. Growth of sedimentary Bathyarchaeota on  
118 lignin as an energy source. *Proc Nat Acad Sci* **115**: 6022-6027.

119

120 **Supplemental Figures**

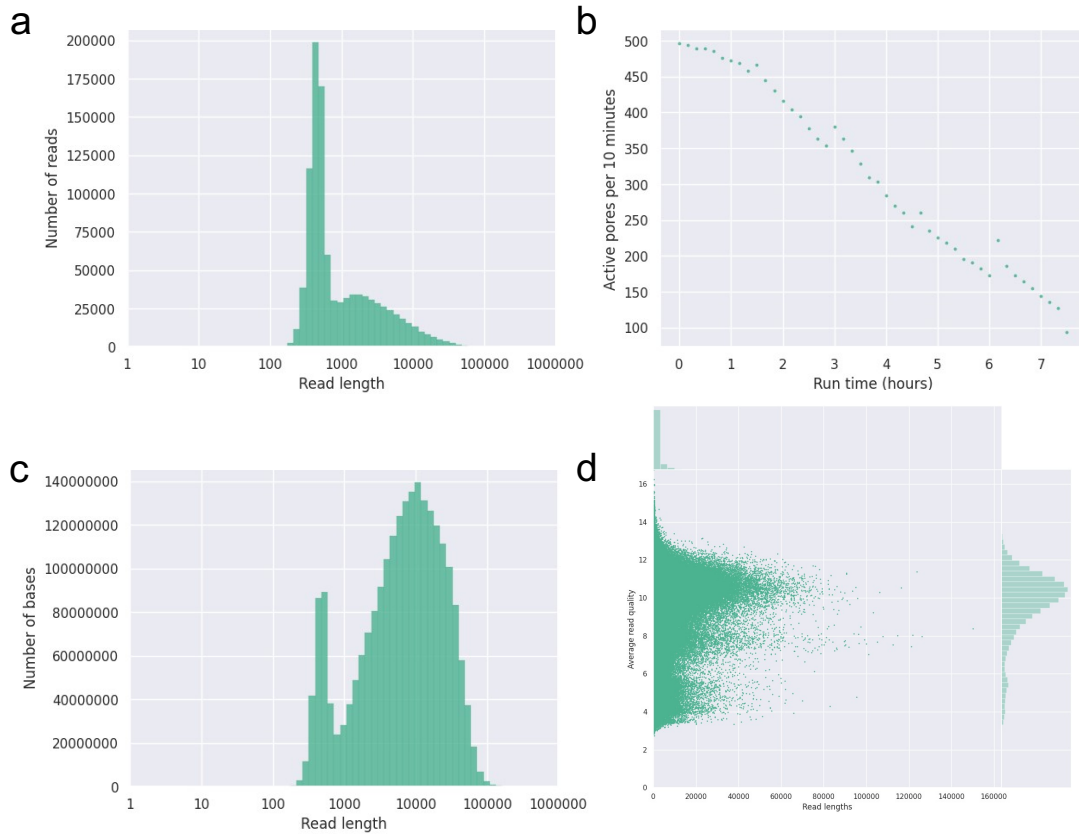

121  
 122 **Supplemental\_Fig\_S1.** Selective sequencing report of mock community. a)   
 123 Histogram of lengths after log transformation. b) Number of total active pores over   
 124 time. c) Weighted histogram of read lengths after log transformation. d) Plot of read   
 125 lengths versus average read quality.

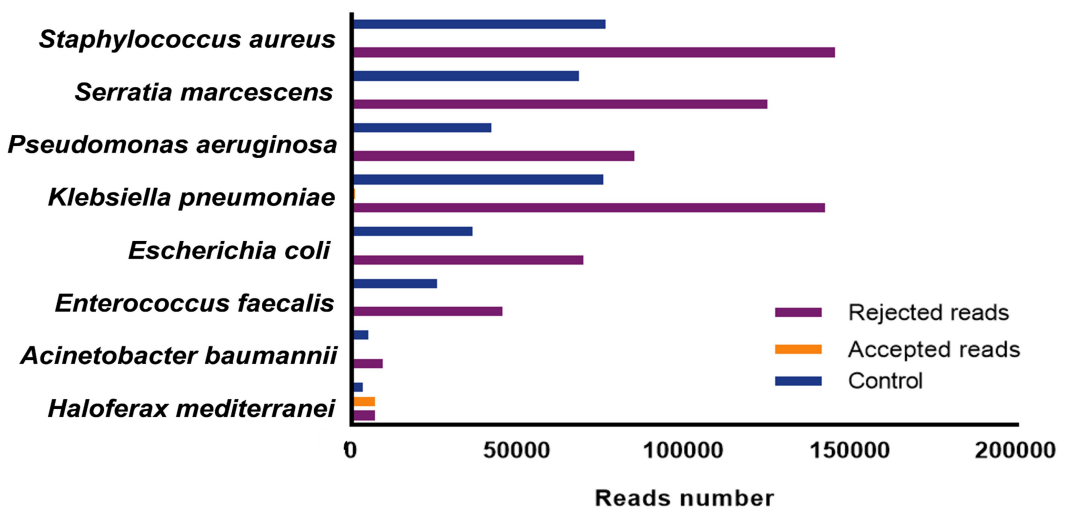

126  
 127 **Supplemental\_Fig\_S2.** Bar plot of reads number of mock community   
 128 sequencing. The number of rejected and accepted reads of the RU channels   
 129 and reads number in the control channels are respectively shown.

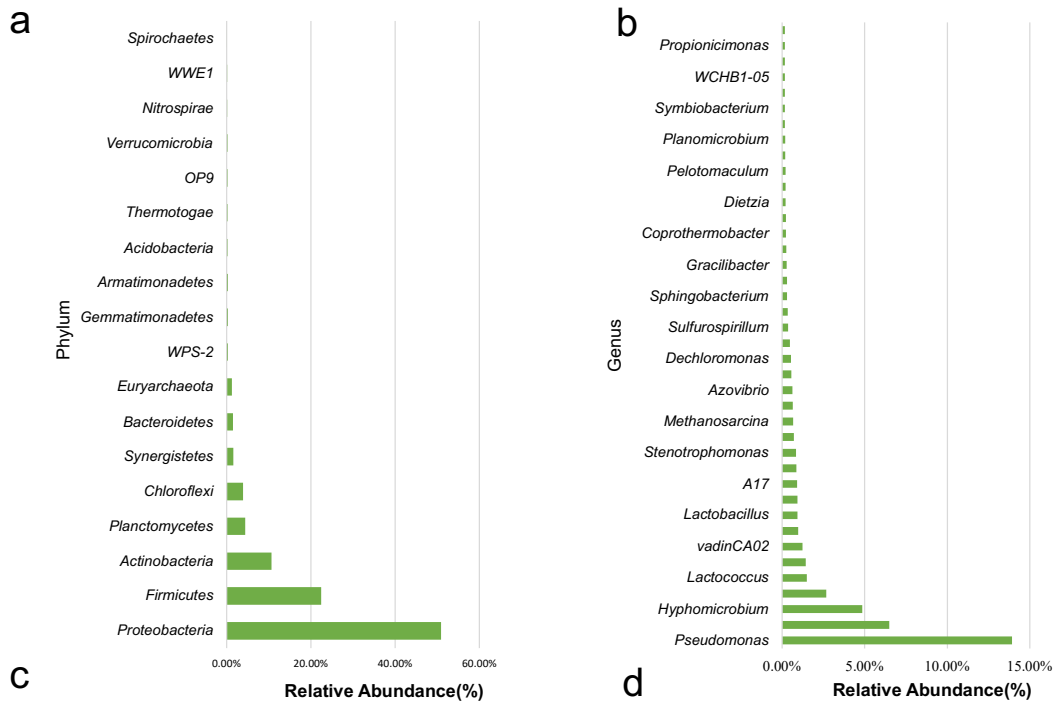

131

132

133

134

135

**Supplemental\_Fig\_S3.** community structure of the thermophilic anaerobic digester (TAD) community. a) Phylum, b) Genus level community structure of the TAD community. c) Classified ratio of each taxonomy level. d) Alpha diversity index based on metagenome extracted 16S rRNA.

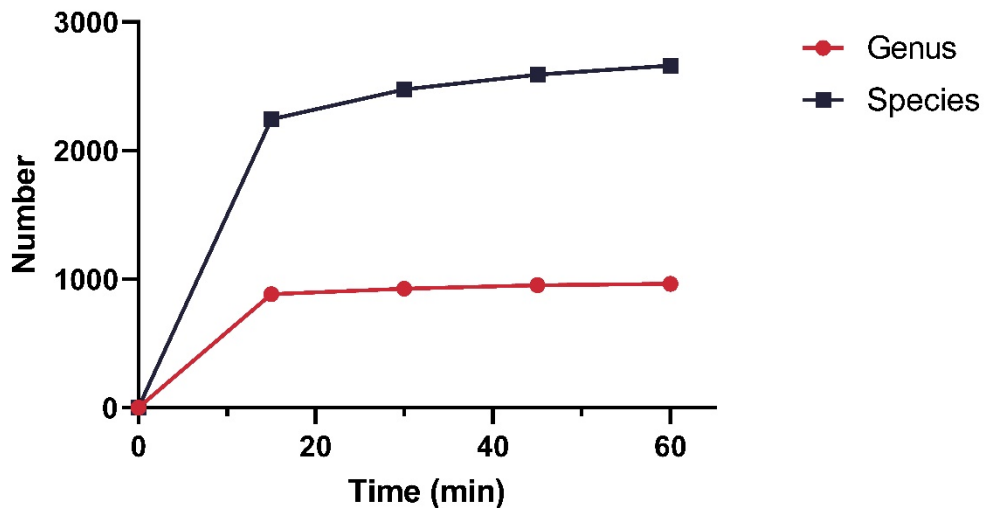

136

137

138

139

140

**Supplemental\_Fig\_S4.** Rarefaction analysis of nanopore sequencing data. The Y-axis is the number of species or genus annotated by Centrifuge. The curve is close to saturation at 60min.

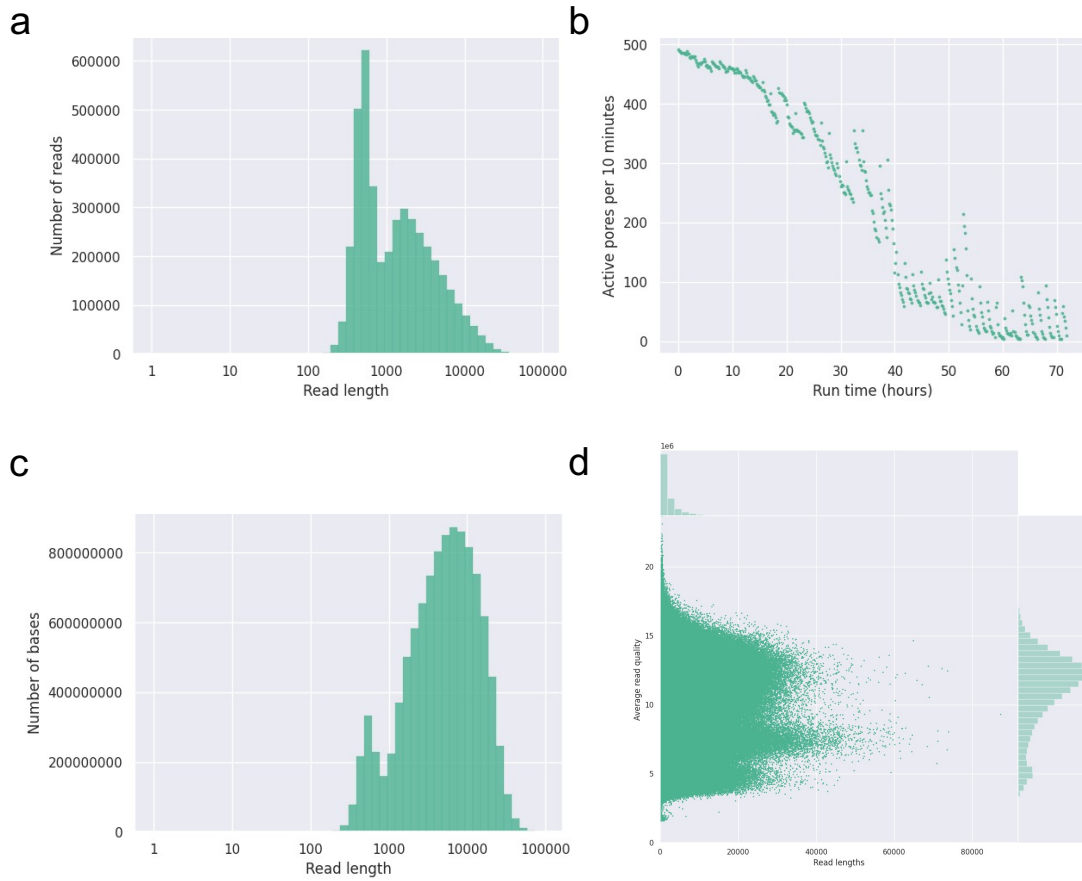

141

142 **Supplemental\_Fig\_S5.** Report of TAD community sequenced with metaRUopore. a)

143 Histogram of lengths after log transformation. b) Number of total active pores over

144 time. c) Weighted histogram of read lengths after log transformation. d) Plot of read

145 lengths versus average read quality.

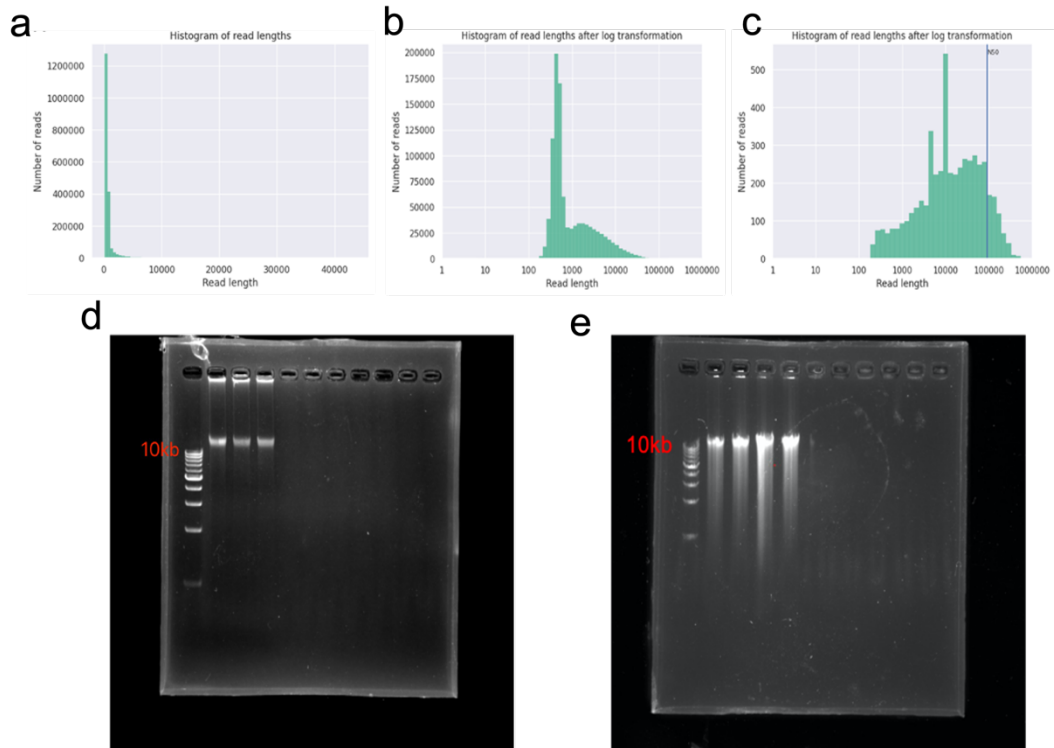

146

147 **Supplemental\_Fig\_S6.** Read-length histograms of a) rejected reads and b)  
 148 total reads in RU runs as well as c) control runs in the TAD community. Gel  
 149 image of d) 4 samples of the TAD community and e) the 3 samples of the  
 150 human gut.

151

152

153

154

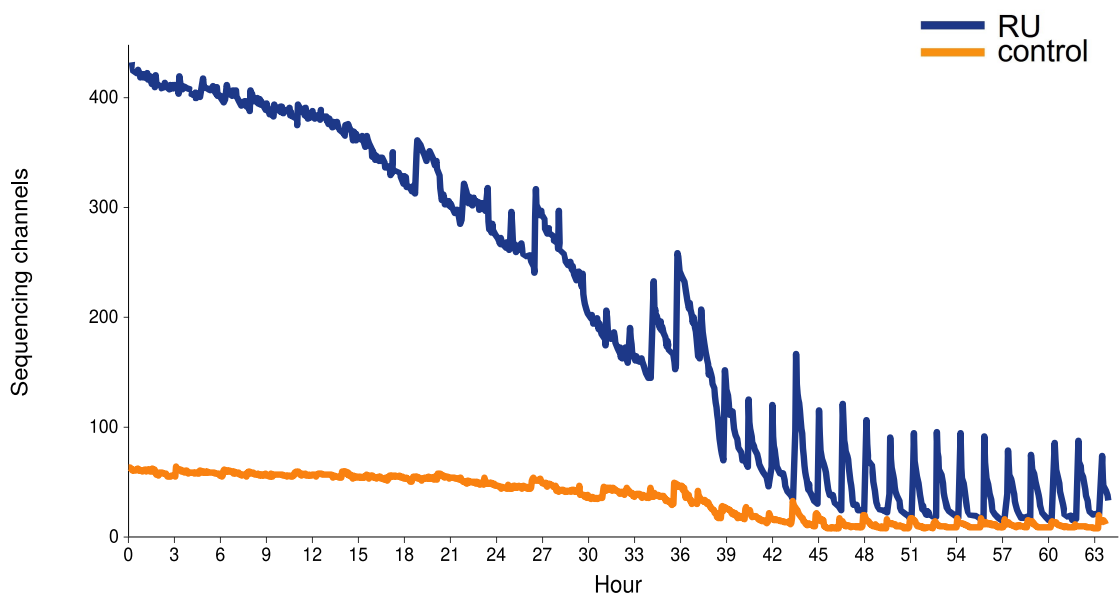

155

156 **Supplemental\_Fig\_S7.** The number of sequencing channels over the course of the  
 157 sequencing run in TAD community. It shows that active pore loss speed of RU-  
 158 channels was faster than that of the control channels by the slop of the line.  
 159  
 160

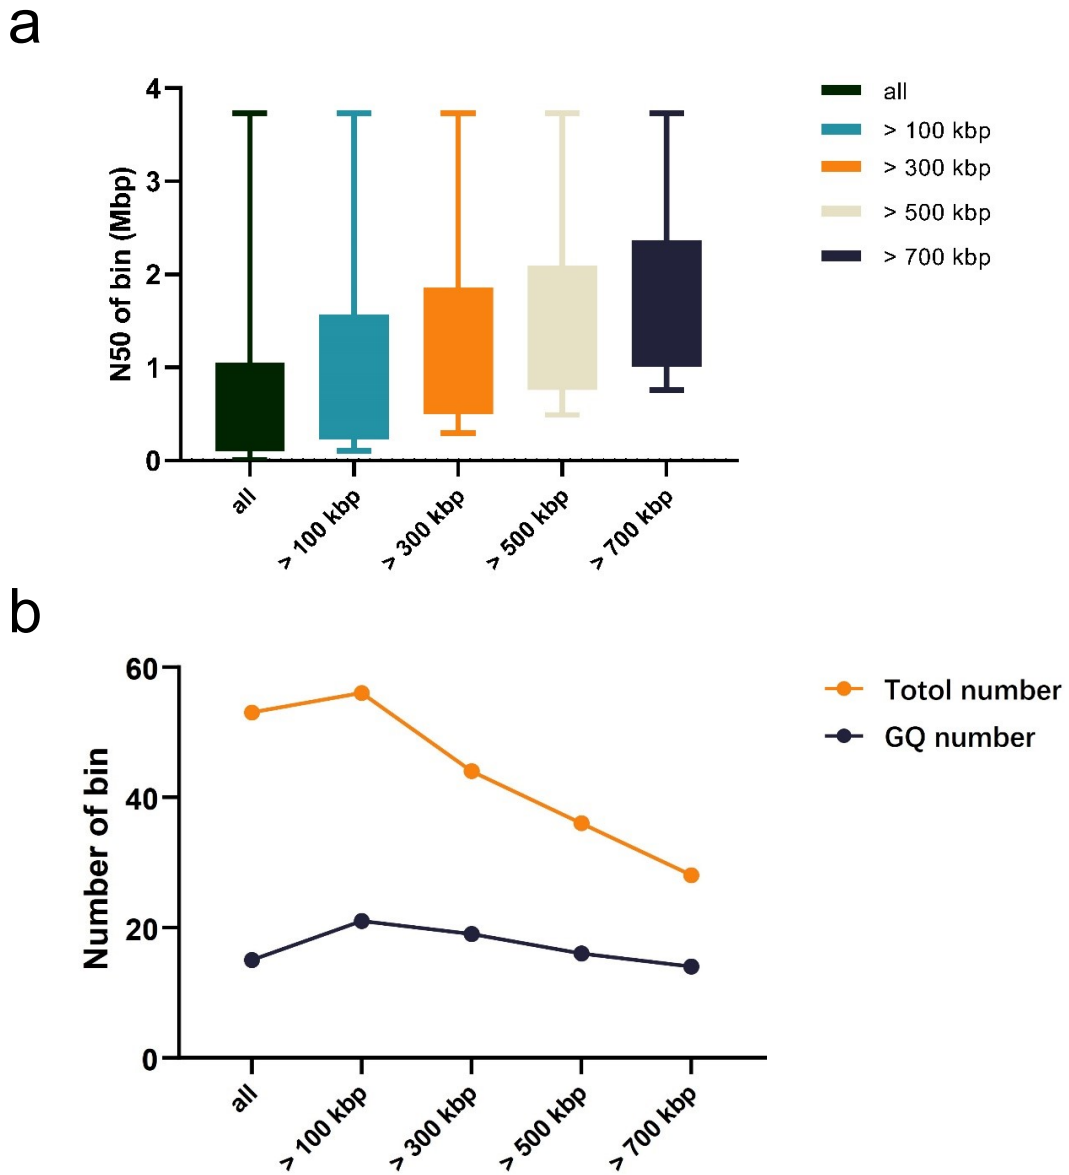

161  
 162  
 163 **Supplemental\_Fig\_S8.** The quality and quantity of bins obtained for contigs of  
 164 different lengths. We grouped the contigs <1M into five categories: >700 kbp, >500  
 165 kbp, >300 kbp, >100 kbp, and all contigs and binned them separately. As a result,  
 166 binning with >100kb contigs could achieve the greatest balance between quantity  
 167 and quality of MAGs, so we finally chose 100kbp as a tradeoff for binning. a) N50 of  
 168 the bin obtained from contigs of different length groups. b) Number or good-quality  
 169 number of the bin obtained from contigs of different length groups. Good quality bins

170 mean they have > 80% SCG-completeness and < 5% contamination, with the  
171 potential to be corrected to high-quality bins.

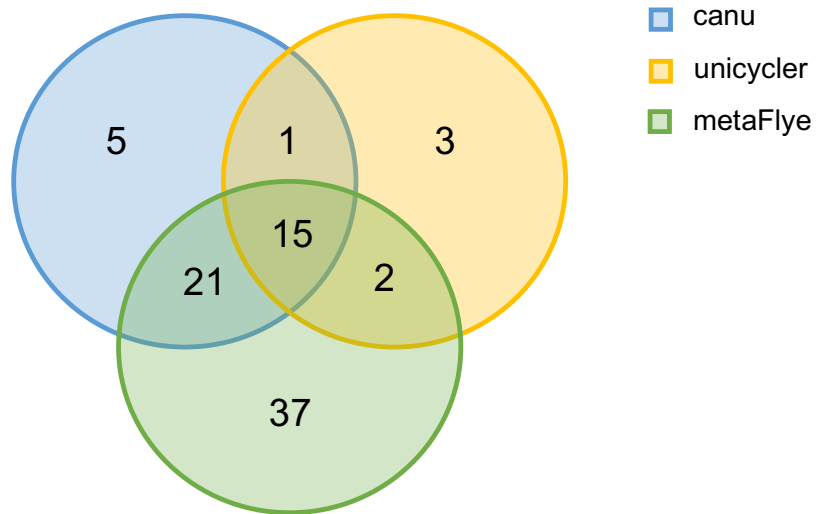

172

173

174 **Supplemental\_Fig\_S9.** Venn diagram of the number of >1Mbp contigs assembled  
175 from Canu, Unicycler, and metaFlye, respectively. We assembled the nanopore data  
176 with Canu, Unicycler, and metaFlye, respectively, and de-duplicated them by dRep  
177 with a relatedness threshold of ANI > 0.95. We found that the three tools produced  
178 duplicate >1 Mbp contigs, but each tool was able to assemble additional contigs.

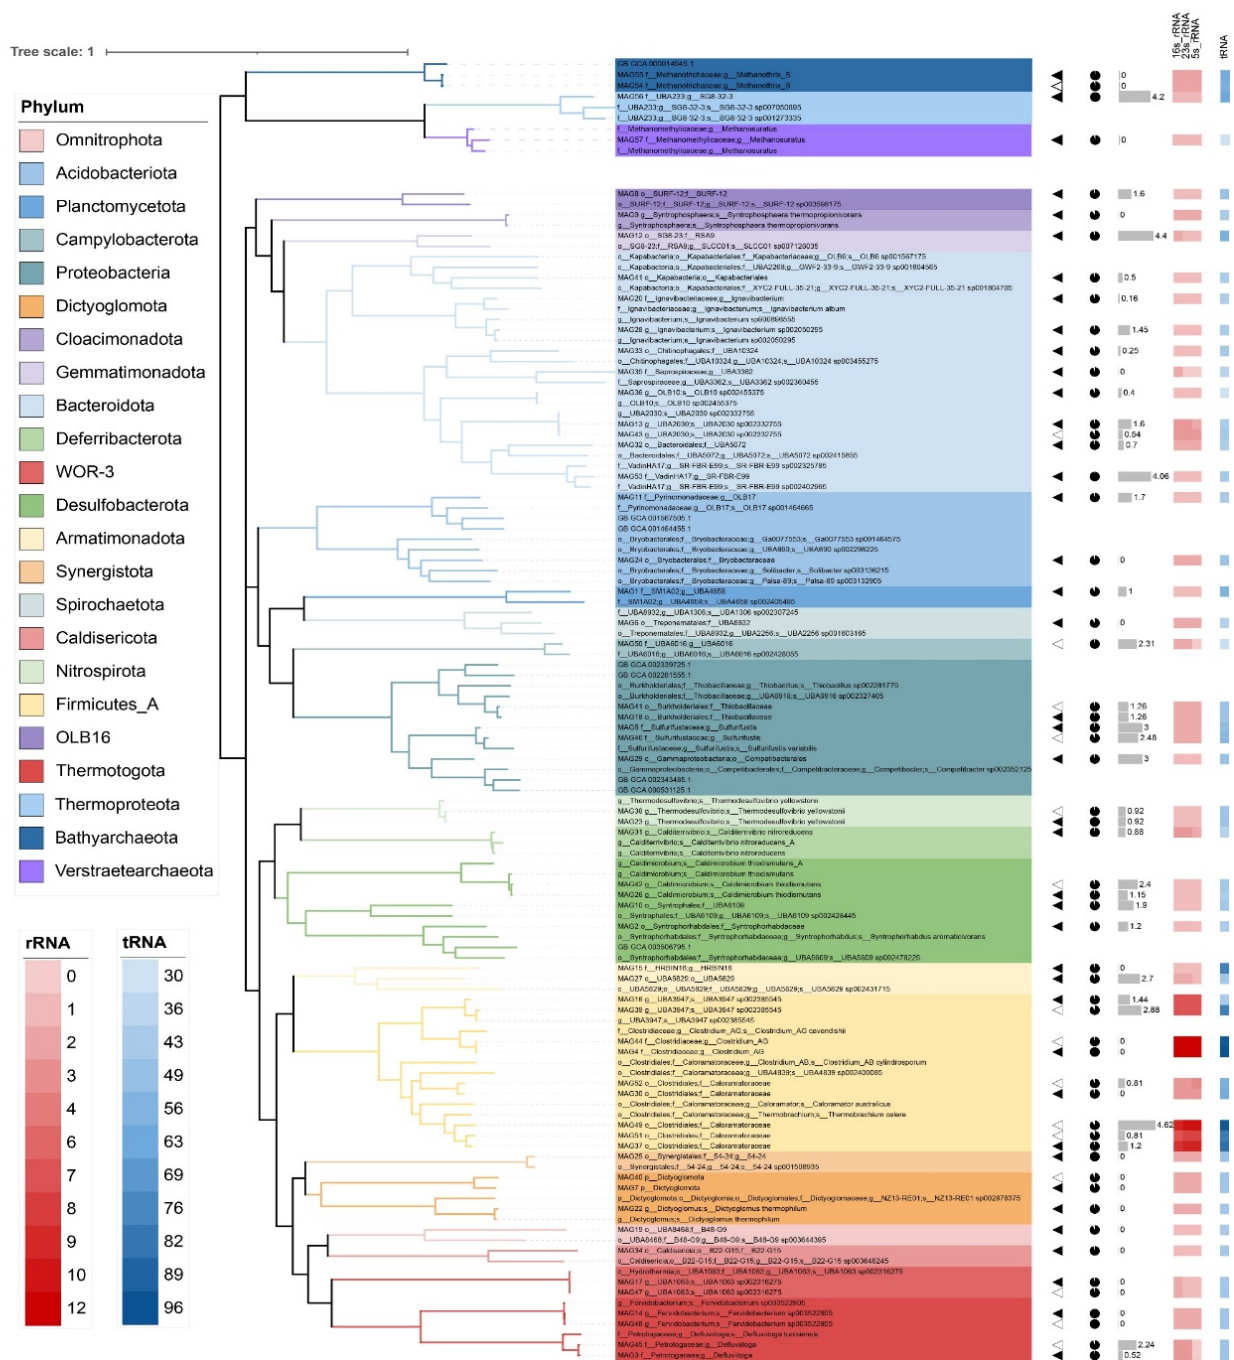

180  
 181 **Supplemental\_Fig\_S10.** A phylogenetic tree was constructed from 57 HQ genomes  
 182 derived from the TAD community and reference genomes. The solid triangles  
 183 represent the 41 MAGs assembled from the metaRUPore dataset and the hollow  
 184 triangles represent the 16 MAGs assembled from the normal sequencing dataset.  
 185 The different colored branches of the tree represent phyla, the pie chart represents  
 186 genomic SCG-completeness and the bar chart represents genomic contamination.  
 187 The copy number of 16S rRNA, 23S rRNA, and 5S rRNA is represented by the red  
 188 heat map from left to right, while the copy number of tRNA is represented by the blue  
 189 heat map.





a

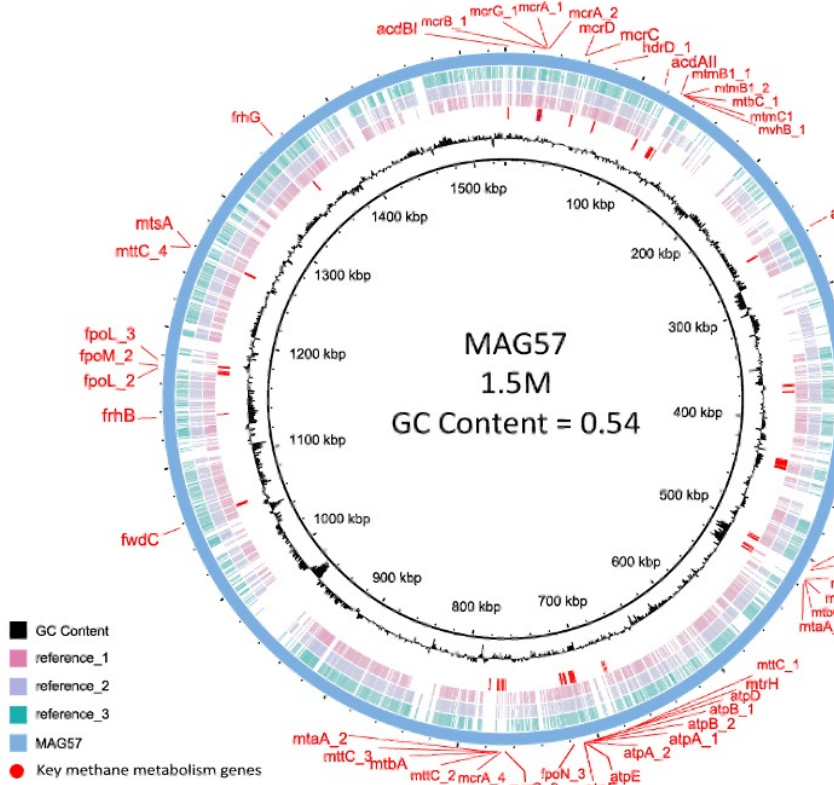

b

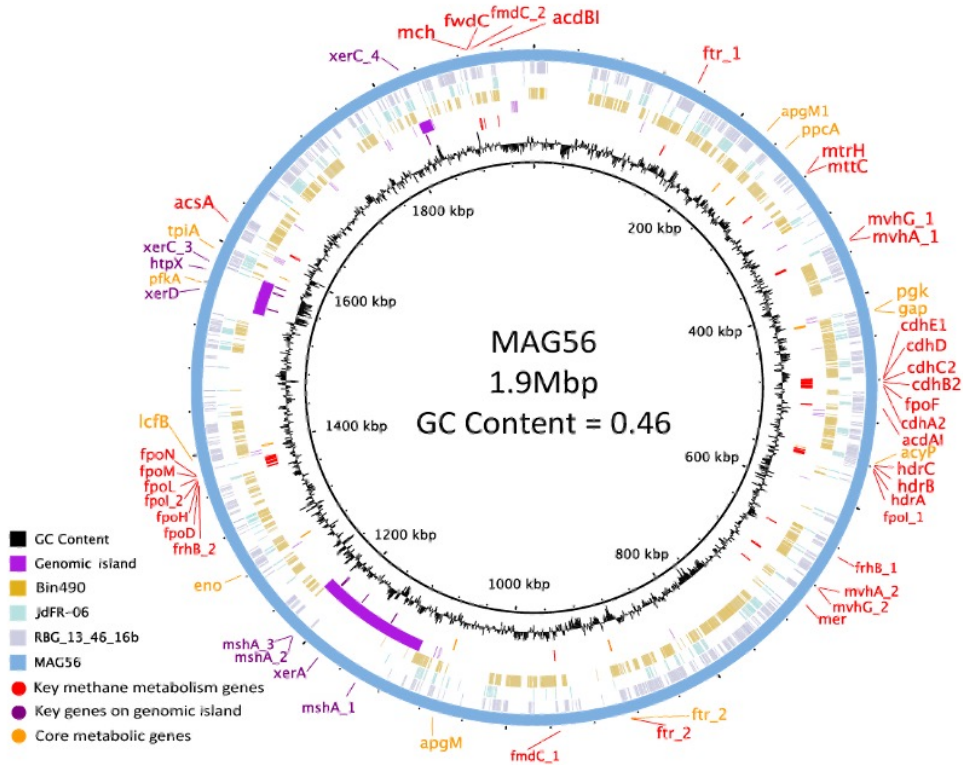

201

202

203

**Supplemental\_Fig\_S13.** a) Genomes comparison of MAG57 of the *Verstraetearchaeota* phylum and reference MAGs. The outermost ring stands for the

204 circular genome of MAG57 reconstructed by metaRUpore. The second to fourth  
 205 circles from the outside represent the MAGs of phylum *Verstraetearchaeota*  
 206 reconstructed by short reads-only assembly method, which was mapped to MAG57.  
 207 The two innermost circles from the outside to the inside indicated the key methane  
 208 metabolism predicted genes by Prokka and GC content, respectively. b) Genomes  
 209 comparison of MAG56 of the *Bathyarchaeota* phylum and reference MAGs. The  
 210 outermost ring stands for the circular genome of MAG56 of the reconstructed by  
 211 metaRUpore. The second to fourth circles from the outside represent the MAG,  
 212 which was mapped to MAG56. The fifth purple circle represents the genomic island.  
 213 The sixth circle from the outside indicated the key methane metabolism genes (red),  
 214 key genes on a genomic island (purple) and core metabolic genes (orange) predicted  
 215 by Prokka and the innermost circles represent GC content.  
 216

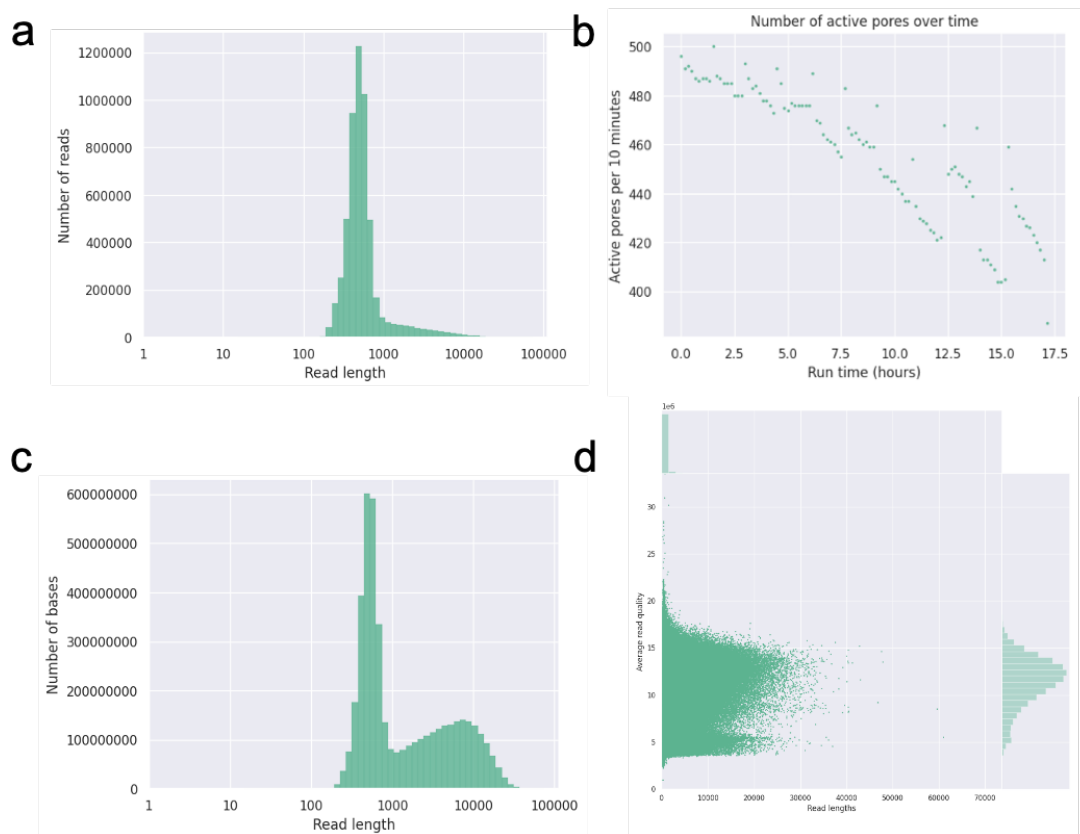

217  
 218 **Supplemental\_Fig\_S14.** Report of human gut microbial community sequenced with  
 219 metaRUpore. a) Histogram of lengths after log transformation. b) Number of total  
 220 active pores over time. c) Weighted histogram of read lengths after log  
 221 transformation. d) Plot of read lengths versus average read quality.

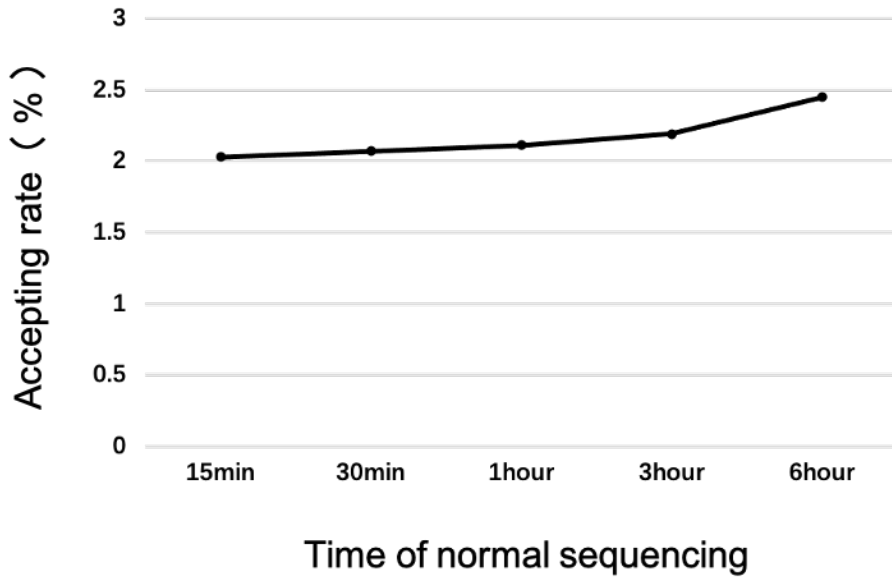

222  
223  
224  
225

**Supplemental\_Fig\_S15.** Correlation between the accepting rate and the time of normal sequencing.

normal sequencing

metaRU pore

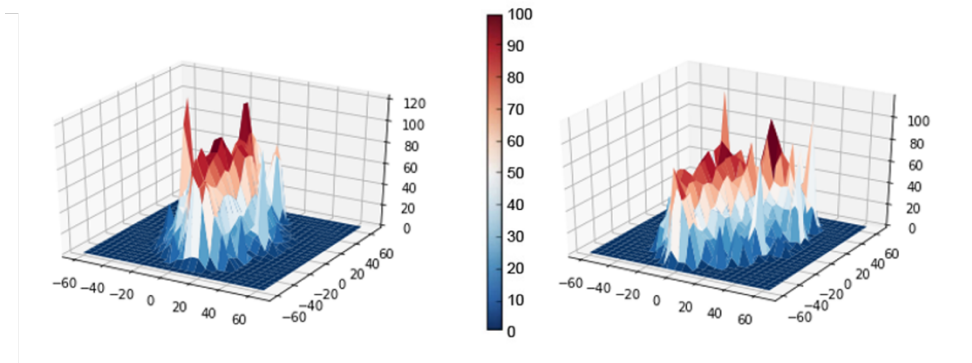

226  
227  
228  
229  
230

**Supplemental\_Fig\_S16.** 3D density plots of t-SNE downscaling results for normal sequencing datasets and selective sequencing datasets by metaRU pore at four base frequencies, showing that metaRU pore renders the human hut community structure homogenous.

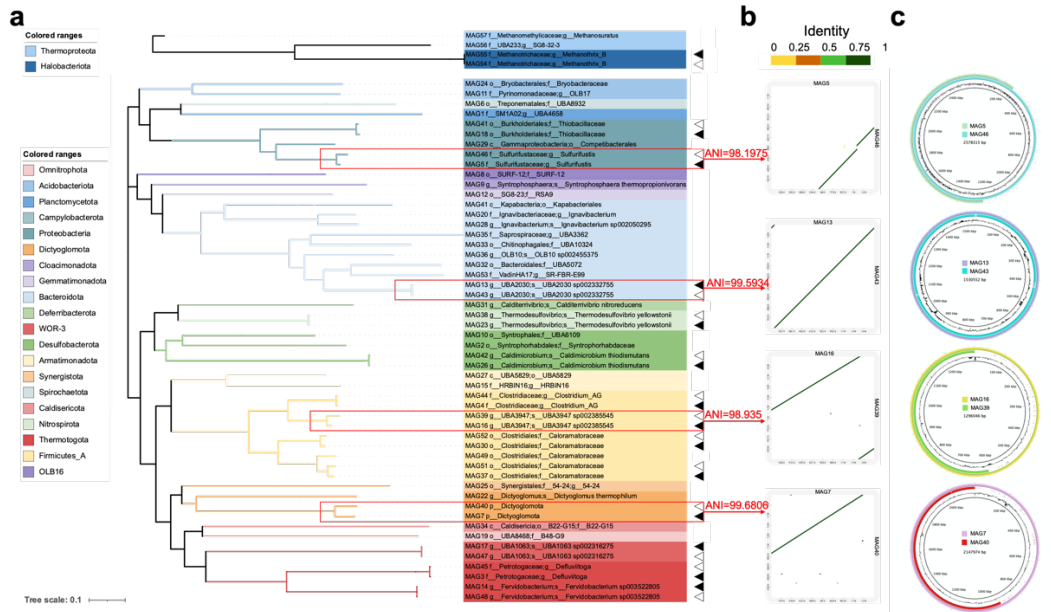

231  
232  
233  
234  
235  
236  
237  
238  
239  
240

**Supplemental\_Fig\_S17.** a) Evolutionary tree of high-quality MAGs assembled from normal sequencing and metaUPore. The hollow triangle represents MAGs assembled from normal sequencing data, while the solid triangle represents MAGs assembled from metaUPore data. b) The dot plot and c) ring plot demonstrate that while the metaUPore-recovered genome was evidently larger in size, the regions that can be aligned between the two genomes are highly consistent.

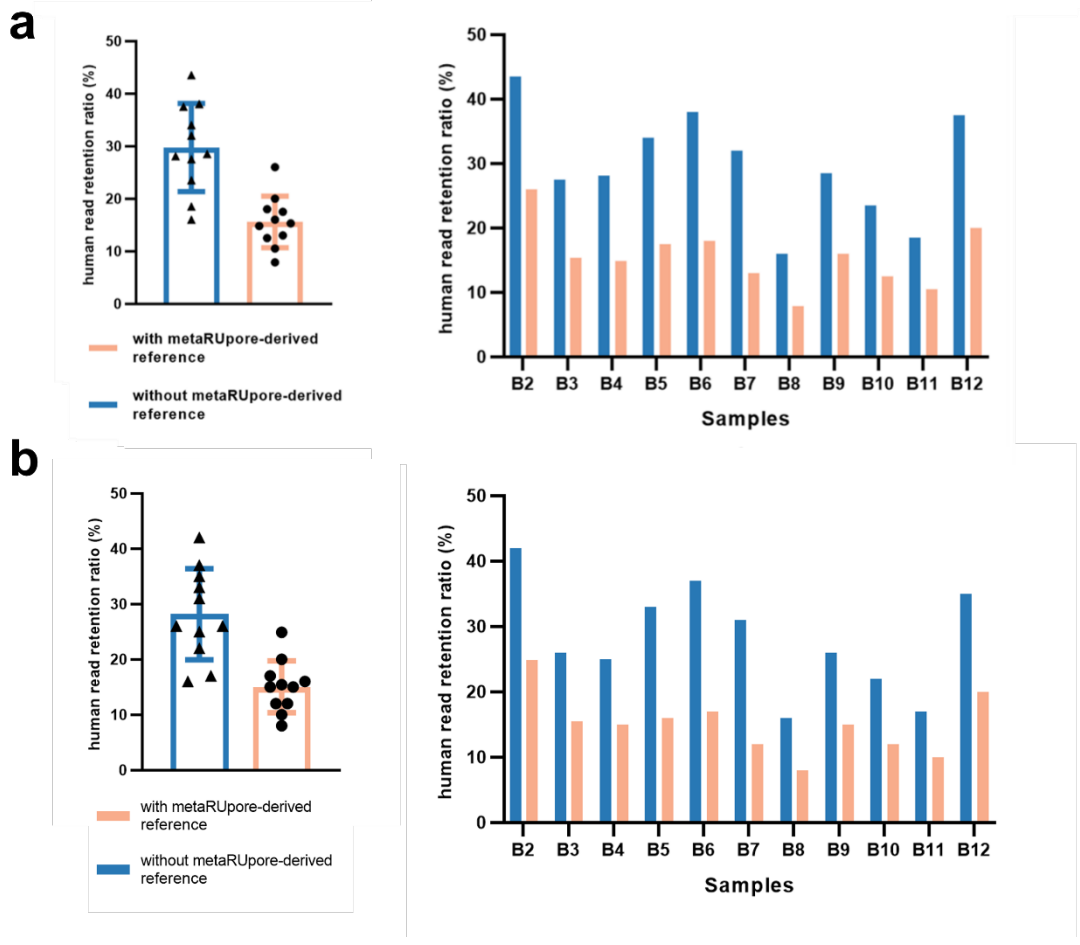

241

242 **Supplemental\_Fig\_S18.** Human reads retention ratio after selective nanopore  
 243 sequencing with or without metaRUpore-derived reference set. a) and b):  
 244 ReadUntil results using GRCh38 and hg19 assembly of the human genome as  
 245 targets for ejection, respectively.

246
