# Supplementary material for: Genome enrichment of rare and unknown species from complicated microbiomes by nanopore selective sequencing
Source: HighWire-hosted journal article supplement (doi:10.1101/gr.277266.122), 2023-04-01
Supplement: Supplemental_Table_S2.xlsx [file Supplemental_Table_S2.xlsx]

## Sheet: Sheet1
Supplemental_Table_S2 Integrated test of metaRUpore using nanopore reads derived from the first one-hour normal sequencing of different sample types. Unless otherwise stated, reads produced in the 1st hour run was extracted based on the sequencing summary file. The script has been tested using 10 threads on a local workstation (CPU: Xeon(R) 5220R 2.20 GHz × 48 cores with DDR4 64 Gb × 16 Memory).
Sample tested	Flow cell chemistry	Kit for library preparation	Total data size, bp	Reads No.	Average read length, bp	Time needed to finish metaRUpore run
TADa reactor	R9.4.1	Ligation sequencing kit SQK-LSK109	400642339	96068	4170	1'24''
Human gut	R9.4.1	Ligation sequencing kit SQK-LSK109	548063306	233775	2344	2'06''
Permafrost top soil	R9.4.1	Ligation sequencing kit SQK-LSK109	172011510	240,000*	716	56''
Receiving Water	R9.4.1	Rapid Barcoding Sequencing (SQK-RBK004)	93425864	15181	6154	34''
HSP STPb Influent	R9.4.1	Ligation sequencing kit SQK-LSK109	227,873,682	137,317	1659	1'04''
Activated sludge	R9.4.1	Ligation sequencing kit SQK-LSK109	606,311,723	112,172	5405	1'50''
a: TAD, thermophilic anaerobic digestion b: HSP STP, Hospital sewage treatment plant *: fasta5 files generated in the 1st hour was used to extract fasta for this sample.
